# Supplementary material for: Cytokine Release Syndrome and Immune-Related Pneumonitis Associated With Tumor Progression in a Pulmonary Pleomorphic Carcinoma Treated With Nivolumab Plus Ipilimumab Treatment: A Case Report
Source: PubMed Central journal article supplement — JTO Clin Res Rep. 2021 Dec 31;3(2):100272. doi: 10.1016/j.jtocrr.2021.100272 (PMC8763637; doi:10.1016/j.jtocrr.2021.100272), 2021-12-31
Supplement: mmc1.pdf [file mmc1.pdf]

# Supplementary. Figure.1

Day.90 (Intubation)  
Tocilizumab

Day.91

Day.92 (at Infliximab)

Day.93

Day.98 (Extubation)

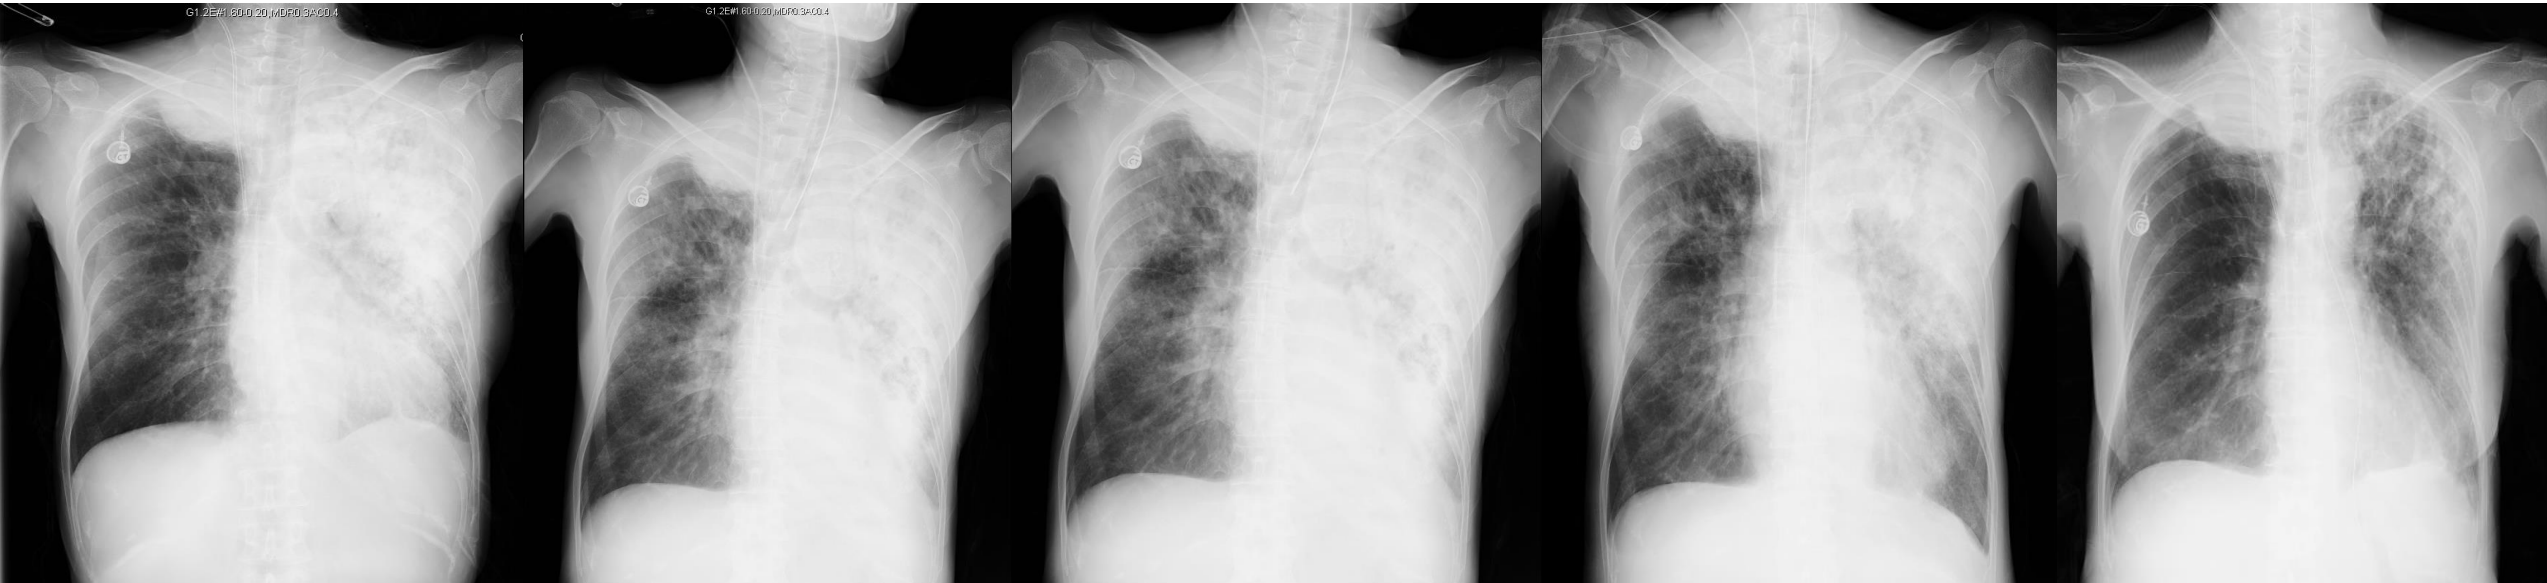

P/F ratio  
80.5

P/F ratio  
79.3

P/F ratio  
68.3

P/F ratio  
121.4

P/F ratio  
280
